# Supplementary material for: Behavioral role of PACAP signaling reflects its selective distribution in glutamatergic and GABAergic neuronal subpopulations
Source: eLife. 2021 Jan 19;10:e61718. doi: 10.7554/eLife.61718 (PMC7875564; doi:10.7554/eLife.61718)
Supplement: Figure 3—source data 4. [file elife-61718-fig3-data4.docx]

Figure 3—source data 4

**Density of *Vipr2* expressing cells in the mouse brain: analysis of *Slc32a1* co-expression and comparison with data from Allen Brain Atlas**

| Abbreviationa | Structure namea | Density  Allenb | Density RNAscope | % of *Slc32a1*  (+) | % of  *Slc32a1*  (-) |
| --- | --- | --- | --- | --- | --- |
| Cortical plate | | | | | |
| DG-sg dorsal | dentate gyrus, granule cell layer, dorsal tier | +++ | n.o. | - | - |
| PIR | piriform area | n.o. | n.o. | - | - |
| Cerebral nuclei | | | | | |
| AAA | anterior amygdalar area | - | n.o. | - | - |
| BSTam | bed nucleus of stria terminalis, anterior division, anteromedial area | - | ++ | ++ | n.o. |
| BSTov | bed nucleus of stria terminalis, anterior division, oval nucleus | +++ | +++ | +++ | n.o. |
| BSTpr | bed nucleus of stria terminalis, posterior division principal nucleus | + | +++ | ++ | + |
| CEAc | central amygdalar nucleus, capsular part | +++ | ++ | ++ | n.o. |
| GPe | globus pallidus, external segment | - | + | + | n.o. |
| MA | magnocellular nuclei | - | + | + | n.o. |
| SI | substantia innominata | - | + | + | n.o. |
| Interbrain | | | | | |
| AM | anteromedial nucleus | ++ | n.o. | - | - |
| AVPV | anteroventral periventricular nucleus | ++++ | n.o. | - | - |
| LD | lateral dorsal nucleus of the thalamus | + | + | - | + |
| LGd | dorsal part of the lateral geniculate complex | +++ | + | - | + |
| LGv | ventral part of the lateral geniculate complex | +++ | n.o. | - | - |
| LH | lateral habenula | + | n.o. | - | - |
| LP | lateral posterior nucleus of the thalamus | + | n.o. | - | - |
| MG | medial geniculate complex | +++ | + | - | + |
| PVT | paraventricular nucleus of the thalamus | + | ++ | n.o. | ++ |
| RE | nucleus of reuniens | + | n.o. | - | - |
| RT | reticular nucleus of the thalamus | +++ | n.o. | - | - |
| VAL | ventral anterior-lateral complex of the thalamus | ++ | + | - | + |
| VM | ventral medial nucleus of the thalamus | ++ | + | - | + |
| VPL | ventral posterolateral nucleus of the thalamus | +++ | + | - | + |
| VPM | ventral posteromedial nucleus of the thalamus | +++ | + | - | + |
| Hypothalamus | | | | | |
| LPO | lateral preoptic area | n.o. | +++ | +++ | n.o. |
| MPO | medial preoptic area | n.o. | +++ | +++ | n.o. |
| SCH | suprachiasmatic nucleus | ++++ | +++ | +++ | n.o. |
| VMH | ventromedial hypothalamic nucleus | + | n.o. | - | - |
| Midbrain | | | | | |
| EW | Edinger-Westphal nucleus | ++ | n.o. | - | - |
| IC | inferior colliculus | n.o. | ++ | ++ | n.o. |
| IPN | interpeduncular nucleus | n.o. | +++ | +++ | n.o. |
| PAG | periaqueductal gray | n.o. | ++ | ++ | n.o. |
| SCm | superior colliculus, motor related | n.o. | ++ | ++ | n.o. |
| SCs | superior colliculus, sensory related | n.o. | +++ | +++ | n.o. |
| Hindbrain | | | | | |
| DTN | Dorsal tegmental nucleus | n.o. | +++ | +++ | n.o. |
| PSV | Principal sensory nucleus of trigeminal nerve | n.o. | +++ | ++ | + |
| V | Motor nucleus of the trigeminal | +++ | +++ | + | ++ |
| NLL | nucleus of lateral lemniscus | n.o. | ++ | ++ | n.o. |
| PCG | pontine central grey | n.o. | + | + | n.o. |
| POR | Superior olivary complex, periolivary region | +++ | n.o. | - | - |
| RPO | nucleus raphe pontis | +++ | + | + | - |
| SOC | superior olivary complex | ++++ | ++ | + | n.o. |
| Medulla | | | | | |
| VCN | dorsal cochlear nucleus | n.o. | ++ | + | + |
| GRN | gigantocellular reticular nucleus | + | + | + | n.o. |
| VNC | vestibular nuclei | n.o. | ++ | + | + |
| NTB | Nucleus of the trapezoid body | n.o. | ++++ | ++++ | n.o. |
| RM | nucleus raphe magnus | n.o. | + | + | n.o. |
| VII | Facial motor nucleus | + | +++ | n.o. | +++ |
| Cerebellum | | | | | |
| FLgr | cerebellar cortex, flocculus | + | ++ | + | + |
| PFLgr | Paraflocculus, granule layer | n.o. | +++ | n.o. | +++ |
| PFLmol | Paraflocculus, molecular layer | n.o. | ++ | ++ | n.o. |

Density is reported in a semiquantitative way depending on the percentage of the Nissl stained nuclei expressing VipR2 mRNA: for 76%-100% (++++), for 51% -75% (+++), for 26% - 50% (++), for 1% 25% (+) and when there was no expression (-). In the cases where it was not possible to observe the region it was indicated as (n.o).

"a" Nomenclature, abbreviations and functional classification are based on the Allen Mouse Brain Atlas.

"b" Evaluation of the VipR2 mRNA density through all the coronal and sagittal sections of the Allen ISH experiments 1104 and 1105. Density was reported in a semiquantitative way depending on the percentage of the Nissl stained nuclei expressing VipR2 mRNA, i.e: (++++) for 76%-100% , (+++) for 51% -75%, (++) for 26% - 50%, (+) for 1% 25% and (-) when there was no expression. In the cases where it was not possible to observe the region it was indicated as (n.o).

"n.o": no signal observed

"-": not applicable
